# Supplementary material
Source: HighWire-hosted journal article supplement (http://jnis.bmj.com/highwire/filestream/166361/field_highwire_adjunct_files/0/neurintsurg-2020-017243supp001_data_supplement.pdf)
Supplement: neurintsurg-2020-017243supp001_data_supplement.pdf [file neurintsurg-2020-017243supp001_data_supplement.pdf]

## Supplemental Material

### Insights into the Pathogenesis of Cerebral Fusiform Aneurysms: High Resolution - MRI and Computational Analysis.

**Table e-1.** Technical parameters for HR-MRI acquisition in a 3T Siemens Magnetom Skyra scanner.

| Parameter            | 3D T1 SPACE     | T2 SPACE  | CE-MRA          |
|----------------------|-----------------|-----------|-----------------|
| TR (msec)            | 900             | 3000      | 3.3             |
| TE (msec)            | 15              | 115       | 1.28            |
| Flip angle           | variable        | variable  | 25              |
| Bandwidth (Hz/pixel) | 446             | 618       | 590             |
| FOV (mm)             | 200 x 200       | 256 x 256 | 223 x 195       |
| Matrix (mm)          | 320 x 320       | 256 x 256 | 252 x 284       |
| Voxel size (mm)      | 0.6 x 0.6 x 0.6 | 1 x 1 x 1 | 0.6 x 0.6 x 0.8 |
| Slice thickness (mm) | 0.63            | 1         | 0.8             |
| ETL                  | 52              | 168       | 0               |
| Acquisition time     | 6:44            | 3:48      | 0:15            |

CE-MRA: contrast-enhanced MRA; ETL: echo train length; FOV: field of view; TE: echo time; TR: response time.

**Table e-2:** Univariate and multivariable logistic regression for independent factors influencing aneurysm wall enhancement.

| Variable                             | Univariate       |                  | Multivariate     |                  |
|--------------------------------------|------------------|------------------|------------------|------------------|
|                                      | OR (95% CI)      | P                | OR (95% CI)      | P                |
| Age                                  | 1.02 (0.96-1.09) | 0.50             | -                | -                |
| Sex                                  | 1.45 (0.60-3.53) | 0.41             | -                | -                |
| Hypertension                         | 1.18 (0.60-2.35) | 0.63             | -                | -                |
| Hyperlipidemia                       | 0.92 (0.48-1.74) | 0.79             | -                | -                |
| Diabetes                             | 1.26 (0.49-3.25) | 0.63             | -                | -                |
| Smoking                              | 1.82 (0.95-3.51) | <b>0.07</b>      | 1.52 (0.72-3.21) | 0.27             |
| Aneurysm Diameter                    | 1.33 (1.18-1.50) | <b>&lt;0.001</b> | 1.30 (1.15-1.47) | <b>&lt;0.001</b> |
| Aneurysm Type (Fusiform vs Saccular) | 3.67 (1.46-9.19) | <b>0.006</b>     | 1.61 (0.52-4.98) | 0.41             |

**Table e-3.** Baseline characteristics of fusiform aneurysms positive/negative for microhemorrhage.

| Variable                             | Total QSM Data N=10 | Positive Microhemorrhage N=5 | Negative Microhemorrhage N=5 | P                |
|--------------------------------------|---------------------|------------------------------|------------------------------|------------------|
| Aneurysm CR (mean ± SD)              | 0.54 ± 0.25         | 0.76 ± 0.13                  | 0.32 ± 0.09                  | <b>&lt;0.001</b> |
| Volume (mean ± SD, mm <sup>3</sup> ) | 1387.0 ± 1909.3     | 2569.4 ± 2166.9              | 204.5 ± 107.5                | <b>0.041</b>     |
| Diameter (mean ± SD, mm)             | 9.9 ± 6.5           | 15.1 ± 5.1                   | 4.7 ± 0.76                   | <b>0.002</b>     |
| Enhancing (%)                        | 4 (40)              | 4 (80.0)                     | 0 (0.0)                      | <b>0.010</b>     |

QSM: Quantitative Susceptibility Mapping. Significant *P* values are highlighted in **bold**.

**Figure e-1.**

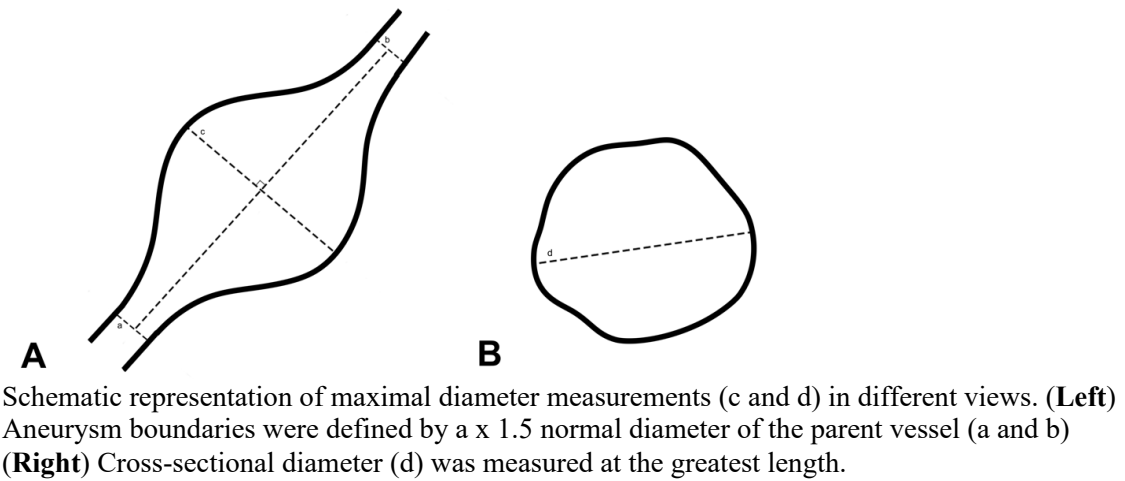

**Figure e-2.**

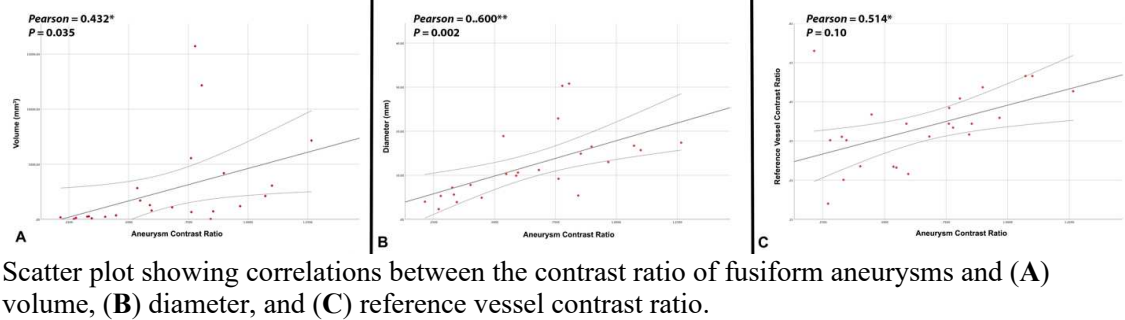

**Figure e-3.**

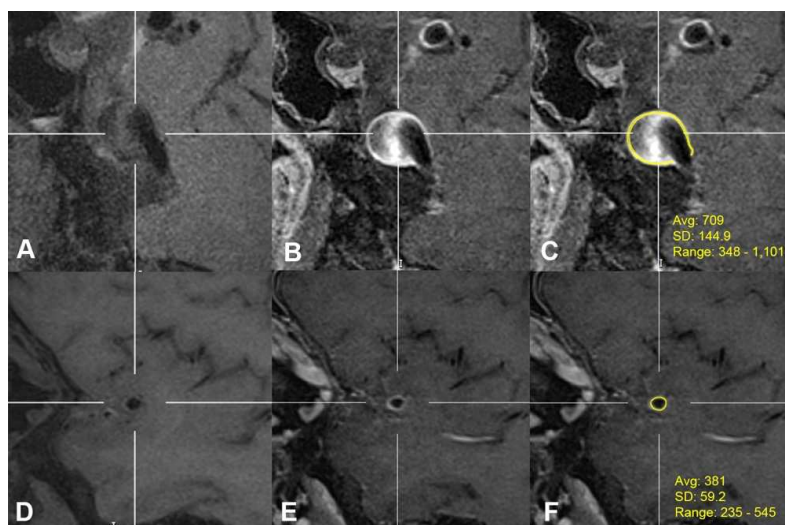

Sagittal T1-pre MRI showing a large basilar aneurysm (**A**) and an orthogonal view of the MCA (**D**). T1-post MRI shows avid enhancement of the aneurysm (**B**) and MCA (**E**). Region of interest of the aneurysmal wall (**C**) and MCA (**F**) shows average (Avg), standard deviation (SD), and range of signal intensity. Notice the avid enhancement of the aneurysm (CR: 1.1) and of the MCA (CR: 0.98).
